# Supplementary material for: Coagulating Colubrids: Evolutionary, Pathophysiological and Biodiscovery Implications of Venom Variations between Boomslang (Dispholidus typus) and Twig Snake (Thelotornis mossambicanus)
Source: Toxins (Basel). 2017 May 19;9(5):171. doi: 10.3390/toxins9050171 (PMC5450719; doi:10.3390/toxins9050171)
Supplement: Supplementary file 1 [file toxins-09-00171-s001.xlsx]

## Sheet: D.typus
Spot #	N	Unused	Total	%Cov	%Cov(50)	%Cov(95)	Accessions	Names	Used	Annotation	Contrib	Conf	Sequence	Modifications	ProteinModifications	Cleavages	dMass	Obs MW	Obs m/z	Theor MW	Theor m/z	Theor z	Sc	Spectrum	Acq Time	Intensity (Peptide)
1	3	8	8	58.51	58.51	58.51	tr|A7X3T2|A7X3T2_DISTY	3FTx-Dis2 OS=Dispholidus typus PE=2 SV=1			2	99	ACPNPQRDEIVNCCYSPECNILI	Carbamidomethyl(C)@2; Carbamidomethyl(C)@13; Carbamidomethyl(C)@14; Carbamidomethyl(C)@19		missed R-D@7	0.00157827	2821.23	1411.62	2821.23	1411.62	2	18	1.1.1.8870.1	29.5815	4334955
1	9	4	4	57.45	41.49	41.49	tr|A7X3U0|A7X3U0_DISTY	3FTx-Dis3 OS=Dispholidus typus PE=2 SV=1			2	99	GCSIICPTPRPDEIVNCCYSPECNPLL	Carbamidomethyl(C)@2; Carbamidomethyl(C)@6; Carbamidomethyl(C)@17; Carbamidomethyl(C)@18; Carbamidomethyl(C)@23			-0.0015268	3220.41	1074.48	3220.41	1074.48	3	30	1.1.1.10190.1	32.4642	1057852
2	2	20.15	20.15	83.33	80	80	tr|I0BWR7|I0BWR7_DISTY	Phospholipase A2 type IIE OS=Dispholidus typus PE=2 SV=1			2	99	NGLDYNGYGCHCGWGGSGQPVDDTDWCCHVHDCCYEALSLR	Deamidated(N)@1; Carbamidomethyl(C)@10; Carbamidomethyl(C)@12; Carbamidomethyl(C)@27; Carbamidomethyl(C)@28; Carbamidomethyl(C)@33; Carbamidomethyl(C)@34			-0.0404416	4847.83	1212.96	4847.87	1212.97	4	25	1.1.1.9346.1	30.6085	789948
2	4	7.46	19.45	70.67	70	70	tr|I0BWR8|I0BWR8_DISTY	Phospholipase A2 type IIE OS=Dispholidus typus PE=2 SV=1			2	99	NGLDYNGYGCHCGWGGSGQPVDDTDWCCHVHDCCYEAVSLRK	Deamidated(N)@1; Carbamidomethyl(C)@10; Carbamidomethyl(C)@12; Deamidated(Q)@19; Carbamidomethyl(C)@27; Carbamidomethyl(C)@28; Carbamidomethyl(C)@33; Carbamidomethyl(C)@34		missed R-K@41	0.00612537	4962.94	993.595	4962.93	993.593	5	24	1.1.1.8293.1	28.3156	684776
3	1	27.53	27.53	78.06	52.74	52.74	sp|Q2XXQ4|CRVP3_DISTY	Cysteine-rich venom protein DIS3 OS=Dispholidus typus PE=2 SV=1			2	99	IGCAASYCPSSSYDYFYVCQYCPTGNFGGLTATPYK	Carbamidomethyl(C)@3; Carbamidomethyl(C)@8; Carbamidomethyl(C)@19; Carbamidomethyl(C)@22			-0.00245635	4124.73	1375.92	4124.74	1375.92	3	31	1.1.1.10551.1	33.2528	1811679
4	8	4	17.96	58.65	46.41	46.41	sp|Q2XXQ6|CRVP1_DISTY; sp|Q2XXQ5|CRVP2_DISTY	Cysteine-rich venom protein DIS1 OS=Dispholidus typus PE=2 SV=1; Cysteine-rich venom protein DIS2 OS=Dispholidus typus PE=2 SV=1			2	99	LWHDEYKNFIYGVGANPPGSVIGHYTQIVWYK			missed K-N@7	-0.0249888	3750.84	938.717	3750.86	938.723	4	26	1.1.1.14065.1	41.2674	1108837
5	6	5.31	5.32	21.7	13.7	12.56	tr|A0A0B8RYU2|A0A0B8RYU2_BOIIR	Metalloproteinase (Type III) 4b OS=Boiga irregularis PE=4 SV=1			0	99	GAKDDCDLAEHCTGQSAECPTDLSQR	Carbamidomethyl(C)@6; Oxidation(H)@11; Carbamidomethyl(C)@12; Carbamidomethyl(C)@19; Carbamidomethyl(S)@24; Deamidated(Q)@25		cleaved P-G@N-term; missed K-D@3	0.0233025	2994.23	999.083	2994.2	999.075	3	24	1.1.1.3014.1	16.9549	3044133
5	10	3.94	3.94	12.58	4.636	4.636	tr|Q9PT48|Q9PT48_9SAUR	Metalloproteinase OS=Atractaspis andersonii PE=2 SV=1			2	99	LLPGAKCDSEECCEQCR	Carbamyl@N-term; Carbamidomethyl(C)@7; Carbamidomethyl(C)@12; Carbamidomethyl(C)@13; Carbamidomethyl(C)@16		missed K-C@6	-0.0191033	2153.84	718.954	2153.86	718.961	3	26	1.1.1.2182.1	15.0206	343122
5	11	2.99	3	34.11	20.09	7.944	tr|A7X4G0|A7X4G0_THRJA	SVMP-Thr1 (Fragment) OS=Thrasops jacksonii PE=2 SV=1			2	99	LRPGAQCEYGECCEQCR	Carbamidomethyl(C)@7; Carbamidomethyl(C)@12; Carbamidomethyl(C)@13; Carbamidomethyl(C)@16			-1.98453	2169.88	724.299	2171.86	724.961	3	22	1.1.1.2782.1	16.4533	3431223
5	13	2.68	2.8	22.47	14.61	14.61	tr|A0A098LYJ6|A0A098LYJ6_PANGU	Snake venom metalloproteinase (Fragment) OS=Pantherophis guttatus PE=2 SV=1			2	99	LQPGAQCESGECCEQCR	Carbamidomethyl(C)@7; Carbamidomethyl(C)@12; Carbamidomethyl(C)@13; Carbamidomethyl(C)@16			-0.000567468	2067.79	690.269	2067.79	690.27	3	23	1.1.1.1352.1	12.7313	45310.4
5	15	2.45	2.46	19.9	4.241	4.241	sp|F8RKW1|VM34_DRYCN	Zinc metalloproteinase-disintegrin-like MTP4 OS=Drysdalia coronoides PE=1 SV=1			2	99	NGHPCQNNEGYCYNGK	Carbamidomethyl(C)@5; Deamidated(Q)@6; Carbamidomethyl(C)@12			-0.00207922	1911.72	638.249	1911.73	638.249	3	16	1.1.1.1326.1	12.6513	13578.5
5	25	2.01	2.66	15.06	8.757	7.531	tr|A0A182C6C0|A0A182C6C0_9SAUR	Metalloproteinase (Fragment) OS=Phalotris mertensi PE=4 SV=1			2	99	YIEFVIVVDNR				-0.000313592	1365.73	683.872	1365.73	683.872	2	17	1.1.1.10863.1	33.934	1452286
5	29	2.01	2.01	17.18	1.473	1.473	tr|E9JG69|E9JG69_ECHCO	Metalloproteinase OS=Echis coloratus PE=2 SV=1			2	99	IPCAPQDVK	Carbamidomethyl(C)@3			0.000793662	1026.52	514.266	1026.52	514.266	2	13	1.1.1.2517.1	15.8446	214227

## Sheet: T.mossambicnus
Spot #	N	Unused	Total	%Cov	%Cov(50)	%Cov(95)	Accessions	Names	Used	Annotation	Contrib	Conf	Sequence	Modifications	ProteinModifications	Cleavages	dMass	Obs MW	Obs m/z	Theor MW	Theor m/z	Theor z	Sc	Spectrum	Acq Time	Intensity (Peptide)
1	9	4	4	24.47	24.47	24.47	tr|A7X3T6|A7X3T6_THRJA	3FTx-Thr1 OS=Thrasops jacksonii PE=2 SV=1			2	99	ACPNPKRDEIVNCCYSPECNILI	Carbamidomethyl(C)@2; Carbamidomethyl(C)@13; Carbamidomethyl(C)@14; Carbamidomethyl(C)@19		missed K-R@6; missed R-D@7	0.0273367	2821.29	1411.65	2821.27	1411.64	2	19	1.1.1.9280.1	29.6028	299399
2	2	15.92	15.92	63.33	60	60	tr|I0BWR7|I0BWR7_DISTY	Phospholipase A2 type IIE OS=Dispholidus typus PE=2 SV=1			2	99	NGLDYNGYGCHCGWGGSGQPVDDTDWCCHVHDCCYEALSLR	Deamidated(N)@1; Carbamidomethyl(C)@10; Carbamidomethyl(C)@12; Carbamidomethyl(C)@27; Carbamidomethyl(C)@28; Carbamidomethyl(C)@33; Carbamidomethyl(C)@34			-0.0192731	4847.85	1212.97	4847.87	1212.97	4	21	1.1.1.9405.1	29.8853	622861
3	1	28.51	28.51	84.81	66.24	66.24	sp|Q2XXQ5|CRVP2_DISTY	Cysteine-rich venom protein DIS2 OS=Dispholidus typus PE=2 SV=1			2	99	SGPTCGDCPSACDNGLCTNPCSREDVFMNCK	Carbamidomethyl(C)@5; Carbamidomethyl(C)@8; Carbamidomethyl(C)@12; Carbamidomethyl(C)@17; Carbamidomethyl(C)@21; Oxidation(M)@28; Carbamidomethyl(C)@30		missed R-E@23	-0.058154	3581.29	1194.77	3581.35	1194.79	3	21	1.1.1.5206.1	20.7887	2717999
3	1	28.51	28.51	84.81	66.24	66.24	sp|Q2XXQ5|CRVP2_DISTY	Cysteine-rich venom protein DIS2 OS=Dispholidus typus PE=2 SV=1			2	99	SLVAQSNCQDDYIR	Carbamidomethyl@N-term; Deamidated(Q)@5; Carbamidomethyl(C)@8			-0.00202547	1725.76	863.888	1725.76	863.889	2	20	1.1.1.5053.1	20.4636	10422850
4	3	28.51	28.51	84.81	66.24	66.24	sp|Q2XXQ5|CRVP2_DISTY	Cysteine-rich venom protein DIS2 OS=Dispholidus typus PE=2 SV=1			2	99	NFIYGVGANPPGSVIGHYTQIVWYK				-0.00088442	2779.41	927.478	2779.41	927.478	3	21	1.1.1.12209.1	36.0284	236830
4	8	4	4	29.29	17.57	17.57	tr|A0A098M249|A0A098M249_9SAUR	Cysteine-rich secretory protein 1b OS=Hypsiglena sp. JMG-2014 PE=3 SV=1			2	99	SVSPTASNMLR				-0.000237465	1161.58	581.798	1161.58	581.798	2	15	1.1.1.4317.1	18.908	1905960
4	22	2.03	7.6	19.67	14.23	14.23	tr|A0A098LYK0|A0A098LYK0_PANGU	Cysteine-rich secretory protein B OS=Pantherophis guttatus PE=2 SV=1			2	99	SVSPTASNMLKMEWYSEAASNAER	Formyl(K)@11		missed K-M@11	-0.0011488	2686.2	896.407	2686.2	896.407	3	29	1.1.1.9507.1	30.1104	419320
4	3	8	16.72	48.1	37.55	37.55	sp|Q2XXQ4|CRVP3_DISTY	Cysteine-rich venom protein DIS3 OS=Dispholidus typus PE=2 SV=1			2	99	SGPTCGDCPSACDNGLCTNPCSREDVFTNCK	Carbamidomethyl(C)@5; Carbamidomethyl(C)@8; Carbamidomethyl(C)@12; Carbamidomethyl(C)@17; Pro->pyro-Glu(P)@20; Carbamidomethyl(C)@21; Carbamidomethyl(C)@30		missed R-E@23	0.0277339	3549.37	888.35	3549.34	888.343	4	25	1.1.1.5323.1	21.0417	2938415
4	8	4	4	29.29	17.57	17.57	tr|A0A098M249|A0A098M249_9SAUR	Cysteine-rich secretory protein 1b OS=Hypsiglena sp. JMG-2014 PE=3 SV=1			2	99	SGPTCGDCPSACDNGLCTNPCTTEDKFTNCK	Carbamidomethyl(C)@5; Carbamidomethyl(C)@8; Carbamidomethyl(C)@12; Carbamidomethyl(C)@17; Carbamidomethyl(C)@21; Delta:H(2)C(2)(K)@26; Carbamidomethyl(C)@30		missed K-F@26	0.0130798	3549.38	888.352	3549.37	888.349	4	25	1.1.1.5245.1	20.873	2996464
4	1	28.51	28.51	84.81	66.24	66.24	sp|Q2XXQ5|CRVP2_DISTY	Cysteine-rich venom protein DIS2 OS=Dispholidus typus PE=2 SV=1			2	99	LWHDEYKNFIYGVGANPPGSVIGHYTQIVWYK	Deamidated(N)@8		missed K-N@7	0.0173628	3751.86	938.973	3751.85	938.969	4	32	1.1.1.14334.1	41.2267	1006104
5	5	6	6	22.83	12.68	12.68	tr|R4G2Y9|R4G2Y9_9SAUR	SVMP-Hop-45 (Fragment) OS=Hoplocephalus bungaroides PE=2 SV=1			2	99	LQHEAQCDSGECCEKCKFK	Formyl@N-term; Deamidated(Q)@2; Oxidation(H)@3; Carbamidomethyl(C)@7; Carbamidomethyl(C)@12; Carbamidomethyl(C)@13; Carbamidomethyl(C)@16		missed K-C@15; missed K-F@17	0.0418543	2458.01	820.343	2457.97	820.329	3	28	1.1.1.3563.1	17.2828	6346840
5	4	7.2	7.21	28.65	28.65	28.65	tr|A0A098LYJ6|A0A098LYJ6_PANGU	Snake venom metalloproteinase (Fragment) OS=Pantherophis guttatus PE=2 SV=1			2	99	GARDDCDLAEHCTGQSAECPTDLFQR	Carbamidomethyl(C)@6; Carbamidomethyl(C)@12; Deamidated(Q)@15; Carbamidomethyl(C)@19; Dehydrated(T)@21		missed R-D@3	0.0308247	2991.25	998.09	2991.22	998.08	3	23	1.1.1.5615.1	21.6667	7143224
6	6	4.69	4.69	24.26	8.197	5.574	tr|A0A098M208|A0A098M208_9SAUR	Metalloproteinase (Type III) 9a OS=Hypsiglena sp. JMG-2014 PE=3 SV=1			2	99	DGHPCQNNQGYCYNGK	Carbamidomethyl(C)@5; Carbamidomethyl(C)@12			-0.000418769	1910.74	637.921	1910.74	637.921	3	16	1.1.1.1509.1	12.3162	14408.4
6	14	2.65	2.65	25.17	4.636	2.815	tr|Q9PT48|Q9PT48_9SAUR	Metalloproteinase OS=Atractaspis andersonii PE=2 SV=1			2	99	LLPGAKCDSEECCEQCR	Carbamidomethyl(C)@7; Carbamidomethyl(C)@12; Carbamidomethyl(C)@13; Carbamidomethyl(C)@16		missed K-C@6	0.00320911	2110.86	704.626	2110.85	704.625	3	16	1.1.1.3433.1	16.9984	1638803
6	13	2.66	4.68	9.493	6.874	5.892	tr|C6JUN4|C6JUN4_PHIOL; tr|C6JUN3|C6JUN3_PHIOL	Snake venom metalloprotease OS=Philodryas olfersii PE=2 SV=1; Snake venom metalloprotease OS=Philodryas olfersii PE=2 SV=1			2	99	KLQPGSQCDSGECCEQCK	Carbamidomethyl(C)@8; Carbamidomethyl(C)@13; Carbamidomethyl(C)@14; Carbamidomethyl(C)@17		cleaved C-K@N-term; missed K-L@1	-1.02157	2168.83	723.952	2169.85	724.292	3	21	1.1.1.2563.1	15.1041	2044896
